1 Androgen-*dmrt1* positive feedback programs the rice field eel  
2 (*Monopterus albus*) sex transdifferentiation

3

4 Bin Wen<sup>1</sup>, Xiancheng Qu<sup>1,\*</sup>, Lisha Pan, Jianzhong Gao, Haowei Wu, Qian Wang

5 Key Laboratory of Freshwater Aquatic Genetic Resources, Ministry of Agriculture,

6 Shanghai Ocean University, Shanghai 201306, China

7 Key Laboratory of Exploration and Utilization of Aquatic Genetic Resources,

8 Ministry of Education, Shanghai Ocean University, Shanghai 201306, China

9 Shanghai Collaborative Innovation for Aquatic Animal Genetics and Breeding,

10 Shanghai Ocean University, Shanghai 201306, China

11 <sup>1</sup> These authors contributed equally to this work

12 \*Corresponding author

13 E-mail: xcqu@shou.edu.cn

14 Tel.: +86-21-61900418

15 Fax: +86-21-61900418

16

## 17 Abstract

18 The rice field eel *Monopterus albus* is a hermaphroditic protogynous fish species that  
 19 undergoes sex reversal from female to male. However, the potential mechanisms  
 20 underlying the process of sex transformation are still unclear. We analyzed and  
 21 compared the gene sequence of *M. albus dmrt1* 5' upstream region and its potential  
 22 transcription factor binding sites with other known species and examined the *in vitro*  
 23 effects of testosterone (T) on the expression levels of *dmrt1a* and *foxl2* in the ovotestis.  
 24 Moreover, we cloned and analyzed the expression of genes encoding enzymes,  
 25 11 $\beta$ -hydroxylase (*11 $\beta$ -h*) and 11 $\beta$ -hydroxysteroid dehydrogenase (*11 $\beta$ -hsd*), involved  
 26 in the production of 11-ketotestosterone (11-KT). The results showed that, compared  
 27 with other fish species, *M. albus dmrt1* 5' upstream region contained unique androgen  
 28 response elements (AREs) with one on the sense strand and the other one on the  
 29 antisense strand, indicating a crucial role for androgens in the transcriptional  
 30 regulation of *dmrt1*. The expression of *dmrt1a* was induced but the expression of  
 31 *foxl2* was inhibited by T manipulation *in vitro*, suggesting that blood androgen could  
 32 activate the transcription of *dmrt1* in the ovotestis. Moreover, the expression levels of  
 33 *11 $\beta$ -h* and *11 $\beta$ -hsd2* were predominantly expressed in testis, much less in ovotestis,  
 34 and barely in ovary, suggesting the production of 11-KT during sex reversal.  
 35 Androgens are synthesized in large amounts during sex reversal, leading to the  
 36 promotion of *dmrt1* transcription, and thus, gonadal somatic cells transdifferentiation.  
 37 Overall, androgen-*dmrt1* positive feedback programs the *M. albus* sex reversal.

38 **Key Words:** *Monopterus albus*; *Dmrt1*; *Foxl2*; *11 $\beta$ -h*; *11 $\beta$ -hsd*.

## 40 Introduction

41 Androgens in teleosts are essential for inducing male phenotype and male  
42 gametogenesis, and female-to-male sex reversal in some species. Both testosterone (T)  
43 and 11-ketotestosterone (11-KT) are detected in males, the latter being the potent  
44 androgen responsible for testicular development (1). The regulation of enzymes  
45 involved in the biosynthesis of 11-KT are critical for teleostean reproduction.  
46  $11\beta$ -hydroxylase (*11\beta-h*) and  $11\beta$ -hydroxysteroid dehydrogenase (*11\beta-hsd*) are two  
47 important steroidogenic substrates for the production of 11-KT (2, 3). During  
48 spermatogenesis substantial changes in the expression level of *11\beta-h* are observed in  
49 rainbow trout *Oncorhynchus mykiss* (4, 5), medaka *Oryzias latipes* (6), Atlantic  
50 salmon (7), Nile tilapia *Oreochromis niloticus* (8, 9) and catfish *Clarias batrachus*  
51 (10). Similarly, *11\beta-hsd* transcripts are present in the steroidogenic tissue of *O. mykiss*  
52 and its transcriptional signals were observed in the Leydig cells of testes, in the thecal  
53 cells of early vitellogenic ovarian follicles, and in the thecal and granulosa cells of  
54 midvitellogenic and postovulatory follicles (2). Also, *11\beta-hsd2* is expressed in various  
55 tissues of *O. niloticus*, with the highest expression level observed in the testis (3).

56 Many genes are known to be involved in gonadal differentiation in vertebrates.  
57 *Dmrt1*, a gene that encodes a transcription factor with a DM-domain, is one of the  
58 essential genes controlling testicular differentiation in mammals, birds, reptiles,  
59 amphibians and fish (11-13). In *O. mykiss*, for example, *dmrt1* is expressed during  
60 testicular differentiation but not during ovarian differentiation (14). *Dmy* is enough for  
61 male development in *O. latipes* and loss of *dmy* in XY medaka causes male-to-female  
62 sex reversal (15-17). *O. latipes* also has an autosomal copy of *dmrt1* which is  
63 expressed in testis later than *dmy* but is essential for testis development (18, 19).  
64 *Dmrt1* is not only associated with testis development, but also, may be crucial for the

65 ovary differentiation in zebrafish (20); however, Webster et al. (21) reported that  
66 *dmrt1* is dispensable for ovary development but necessary for testis development by  
67 regulating *amh* and *foxl2*. Wen et al. (22) observed that *dmrt1* expression was 70  
68 times higher in the testis of olive flounder *Paralichthys olivaceus* than in the ovary.  
69 Also, in European sea bass, the expression of *dmrt1* is increased in testis but  
70 decreased in ovary (23).

71 The rice field eel *Monopterus albus* is a hermaphroditic fish species that  
72 undergoes sexual reversal from a functional female to a male (24). The *M. albus* is  
73 emerging as a specific model for studying vertebrate sexual development due to its  
74 small genome size and naturally occurring sex reversal (25). Yeung et al. (26, 27)  
75 examined the effects of exogenous androgens on sex reversal and sex steroid profiles  
76 in the female of *M. albus*. He et al. (28) observed the ovarian differentiation,  
77 morphogenesis and expression of some gonadal development-related genes in *M.*  
78 *albus*. Several genes related to sex determination and differentiation have been  
79 identified in *M. albus*, including *cyp19a1a* (29), *sox9a* (30), *cyp17* (31), *sox17* (32),  
80 *dmrt1* (33), *jnk1* (34), *foxl2* (35), miRNAs (36) and gonadal soma-derived factor (37).  
81 We also investigated the transcription profiles of some genes involved in gonad  
82 development and sex reversal in the *M. albus* (38, 39). Moreover, a  
83 chromosome-scale assembly of *M. albus* genome is currently available (40). However,  
84 the biology events and potential mechanisms underlying the process of  
85 female-to-male sex reversal in this species are still unclear.

86 Huang et al. (33) reported that not only is *dmrt1* expressed specifically in the  
87 gonads of *M. albus*, but its multiple isoforms are differentially co-expressed during  
88 gonad transformation. Also, Sheng et al. (41) observed that the *dm* genes are involved  
89 in the sexual differentiation of *M. albus*. However, the regulation of *dmrt1* in *M. albus*

90 during sex reversal remains largely unknown. As an important *cis*-acting element,  
 91 core promoter plays pivotal role in the regulation of metazoan gene expression (42,  
 92 43). We assumed that a) the 5' flanking region of *M. albus dmrt1* contains unique  
 93 promoter motifs that regulates its transcription during sex reversal, b) there is no sex  
 94 determination gene in *M. albus*, which sex transformation is an evolution process, c)  
 95 and thus, the process of female-to-male sex reversal is controlled by endocrine  
 96 regulation and sex hormones play a vital role during this process. To test this  
 97 hypothesis, we analyzed and compared the gene sequence of *M. albus dmrt1* 5'  
 98 upstream region and its potential transcription factor binding sites with other fish  
 99 species and examined the *in vitro* effects of T on the expression of *dmrt1a* and *flox2* in  
 100 the ovotestis. Moreover, we cloned and examined the expression patterns of genes  
 101 encoding enzymes, *11 $\beta$ -h* and *11 $\beta$ -hsd2*, involved in the production of 11-KT in the  
 102 testis, ovotestis and ovary tissue, so as to reveal the molecular mechanism of sex  
 103 reversal in *M. albus*.

## 104 **Results**

### 105 ***Nucleotide sequence of dmrt1 5' upstream region***

106 The 5' flanking region of *M. albus dmrt1* was 1421 bp in size. *In silico* functional  
 107 analysis showed the transcription binding sites for AP-1, Oct-1, Zen-1, USF, C/EBPa,  
 108 GATAx, STATx, Foxd3, SRY, Dmrt3, Ftz, ERE, ARE and Sox family of transcription  
 109 factors (Fig. 1). Specifically, in comparison with other known fish species, the  
 110 sequence of *M. albus dmrt1* 5' upstream region contained two unique androgen  
 111 response elements (AREs), with one on the sense strand (-638 bp ~ -648 bp) and the  
 112 other one on the antisense strand (-903 bp ~ -917 bp) (Supplementary Table 2).

### 113 ***Histological change***

114 After 6 hours of tissue culture, cells began to migrate from the periphery of the

gonad. Growing tissue appeared after about 5-6 days and the cells were closely arranged and gradually sparse around tissue. There were three types of cells including spindle-shaped fibroblasts, elliptical nuclei; polygonal epithelioid cells; round germinal stem cells, mononuclear or multicellular. The number of cells increased dramatically forming a single layer within 5-6 days. The epithelioid cells and germinal stem cells began to vacuolate and were gradually apoptosis with the extension of culture time, and fibroblasts dominated after 11-12 days (Fig. 2A-D).

### ***Effects of T on the expression levels of dmrt1a and foxl2***

On day 6 and day 12, with increasing concentrations of T, the expression level of *foxl2* was significantly decreased ( $p < 0.05$ ) (Fig. 3A) but the expression level of *dmrt1a* was significantly increased ( $p < 0.05$ ) (Fig. 3B).

### ***Molecular cloning of the full-length 11 $\beta$ -h cDNA***

The full length of 11 $\beta$ -h cDNA sequence was 1812 bp with an open reading frame of 544 amino acids (Supplementary Fig. 2). The amino acid sequence contained without signal peptide cleavage site or transmembrane helix. Several conserved functional motifs were observed including steroid binding site, oxygen-binding region, Ozols' region, aromatic regions and heme-binding region (Supplementary Fig. 3). We compared the amino acid sequence of *M. albus* 11 $\beta$ -h to that in other species and found 77% identity with *Dicentrarchus labrax*, 76% identity with *Micropogonias undulatus* and 75% identity with *Parajulis poecilepterus* and *Odontesthes bonariensis*. The phylogenetic tree analysis showed that the 11 $\beta$ -h of *M. albus* and *Epinephelus coioides*, *P. poecilepterus*, *D. labrax*, *M. undulatus*, *O. bonariensis*, *O. latipes* and *O.*

137 *niloticus* were clustered together (Supplementary Fig. 4).

### 138 ***Expression of 11 $\beta$ -H mRNA during sex reversal***

139 *11 $\beta$ -h* was highly expressed in the testis, which was significantly higher than that  
140 in the ovary and ovotestis ( $p < 0.05$ ). Moreover, the expression level of *11 $\beta$ -h* in  
141 ovotestis was higher than in the ovary ( $p < 0.05$ ) (Fig. 4).

### 142 ***Molecular cloning of the full-length 11 $\beta$ -hsd2 cDNA***

143 The full length of *11 $\beta$ -hsd2* cDNA sequence was 2267 bp with an open reading  
144 frame of 407 amino acids (Supplementary Fig. 5). The amino acid sequence contained  
145 without signal peptide cleavage site or transmembrane helix. Several conserved  
146 functional motifs were found including NAD-binding domain, *11 $\beta$ -hsd* conserved  
147 sequence and catalytic site (Supplementary Fig. 6). We compared the amino acid  
148 sequence of *M. albus 11 $\beta$ -hsd2* to that in other species and found 83% identity with *O.*  
149 *latipes*, 80% identity with *O. bonariensis* and 77% identity with *O. niloticus*. The  
150 phylogenetic tree analysis showed that the *11 $\beta$ -hsd2* of *M. albus* and *O. bonariensis*,  
151 *O. latipes* and *O. niloticus* were clustered together (Supplementary Fig. 7).

### 152 ***Expression of 11 $\beta$ -hsd2 mRNA during sex reversal***

153 *11 $\beta$ -hsd2* was highly expressed in the testis, which was significantly higher than  
154 that in the ovary and ovotestis ( $p < 0.05$ ). Moreover, the expression level of *11 $\beta$ -hsd2*  
155 in ovotestis was significantly higher than in the ovary ( $p < 0.05$ ) (Fig. 5).

### 156 **Discussion**

157 Promoters are, generally, located at the upstream of a transcription start site and  
158 have a variety of regulatory motifs, such as the interaction of transcription factors

159 with their corresponding binding sites, which participate in gene regulation (44). In  
 160 this study, analysis of the promoter region of *dmrt1* showed various transcription  
 161 binding sites that potentially activated the transcription of *dmrt1*. Specifically, in  
 162 comparison with the *dmrt1* 5' upstream region of other known fish species, only in the  
 163 sequence of *M. albus*, there was one putative ARE on the sense strand (-638 bp ~ -648  
 164 bp), indicating that AR (androgen receptor) was the specific transcription factor of  
 165 *dmrt1* gene. Sex hormones play an important role in mediating physiological  
 166 responses and developmental processes through their receptors across all vertebrates.  
 167 Once androgen ligand binds to AR, the receptor becomes phosphorylated and  
 168 translocates into the nucleus, in which it binds to ARE(s), and activates the  
 169 transcription of *dmrt1* gene.

170 Steroids are known to play a crucial role in gonadal sex differentiation in many  
 171 non-mammalian vertebrates, but also in the gonadal sex change of hermaphroditic  
 172 teleosts. *In vitro* culture showed increased expression level of *dmrt1a* but decreased  
 173 expression level of *foxl2* with increased T concentration and culture time, implying  
 174 the role of androgen in the transcription of sex-related genes during sex reversal in *M.*  
 175 *albus*. Similarly, a hormonal manipulation *in vitro* showed that 11-KT activated the  
 176 Sertoli cells leading to the completion of spermatogenesis in Japanese eel *Anguilla*  
 177 *japonica* (45). Also, Jo et al. (46) observed that the expression levels of *dmrt1* in  
 178 ovary of *P. olivaceus* were significantly up-regulated by T treatment. Raghuveer et al.  
 179 (47) observed that methyl testosterone treatment resulted in the initiation of testicular  
 180 differentiation in juvenile catfish *Clarias gariepinus*, which is supported by specific



181 expression of two forms of *dmrt1*. The expression level of *dmrt1* is high in mature  
182 testis of black porgy *Acanthopagrus schlegeli* during sex-reverse process (48).  
183 Besides fish species, T-treated ovaries induce upregulated expression of *dmrt1* in the  
184 ovotestis of *Rana rugosa* Frogs (49). Aoyama et al. (50) revealed that *dmrt1* was not  
185 transcribed at any time during ovarian development but was expressed in the  
186 female-to-male sex reversed gonad of amphibians. Hu et al. (35) also observed a high  
187 level of *foxl2* expression in the ovary before sex reversal in *M. albus*, but its  
188 transcripts decreased sharply when the gonad developed into the ovotestis and testis.  
189 Overall, *dmrt1* is essential to maintain vertebrate testis determination (51). *Foxl2* is  
190 required to prevent transdifferentiation of an adult ovary to a testis (52). We assumed  
191 that the antagonism between *dmrt1* and *foxl2* might cause reprogramming gonad in *M.*  
192 *albus* (53).

193 We further examined the expression of genes encoding key steroidogenic  
194 enzymes during the process of sex reversal in *M. albus*. The expression of gonadal  
195 *11 $\beta$ -h* showed obvious sexual dimorphism, with high level in the testis and ovotestis,  
196 indicating the vital role of this gene in testis development. Liu et al. (29) also reported  
197 that *11 $\beta$ -h* was markedly up-regulated at the onset of testicular development in *M.*  
198 *albus*. Similarly, the expression level of *11 $\beta$ -h* is comparatively low at the early  
199 spermatogenesis and sharp increases during spermiogenesis, finally, reaches its  
200 highest levels in Atlantic salmon (7). In *O. niloticus*, the expression levels of two  
201 isoforms of *11 $\beta$ -h* are detected in testis from 50 days after hatching (dah) onwards and  
202 strongly expressed in sex reversed XX testis after fadrozole and tamoxifen treatment,

203 but completely inhibited in 17 $\beta$ -estradiol induced XY ovary (9). In *C. batrachus*,  
 204 *11 $\beta$ -h* is expressed ubiquitously with high levels in testis and could be detected as  
 205 early as at 0 dah as supported by high level of 11-KT in serum and testicular tissue  
 206 during pre-spawning and spawning phases, which might facilitate the initiation and  
 207 normal progression of spermatogenesis (10). The gonadal *11 $\beta$ -hsd2* showed similar  
 208 expression pattern with *11 $\beta$ -h* in *M. albus*, indicating the vital role of these two genes  
 209 in the female-to-male reversal. Similarly, *11 $\beta$ -hsd2* is expressed in a wide variety of  
 210 tissues in *O. niloticus*, with the highest expression in testis (3). Yu et al. (31) found  
 211 that the expression levels of 17 $\alpha$ -hydroxylase, were dominantly expressed in testis,  
 212 less in ovary, and the least in ovotestis, consistent with the sex reversal process of *M.*  
 213 *albus*. Similarly, the expression levels of *11 $\beta$ -h* and *11 $\beta$ -hsd2* are predominantly  
 214 expressed in testis, much less in ovotestis, and barely in ovary, consistent with a role  
 215 in the production of 11-KT during sex reversal.

216 During female-to-male sex reversal, the expression level of *foxl2* is sharply  
 217 decreased in *M. albus* (35). Also, the aromatase transcripts are decreased when gonad  
 218 develops into the ovotestis and testis (29). As a result, synthesise of estrogen may  
 219 decrease during sex reversal. Androgen is the substrate for the production of female  
 220 hormone, the level of androgen may thus increase. In this study, T also showed a  
 221 higher inhibitory effect on *foxl2* than positive impact on *dmrt1a*. In this regard, these  
 222 results are accord with the withdrawal hypothesis of estrogen proposed by Nagahama  
 223 (54). Moreover, serum T level in female *M. albus* reaches a peak two months after  
 224 spawning and is significantly higher than the estrogen level (55). Therefore, we

suggested that the high level of androgen is the main driving factor for sex reversal in *M. albus*. However, the withdrawal of estrogen during sex reversal is passive, not active, due to the inhibitory action of androgen-*dmrt1a* on the aromatase-*foxl2*.

In conclusion, the gene sequence of *M. albus dmrt1* 5' upstream region contained two unique AREs, indicating that AR was the specific transcription factor of *dmrt1*. Also, the *dmrt1a* was positive regulated by T, suggesting that the blood androgen could promote the transcription of *dmrt1* during sex reversal. Moreover, high expression levels of *11β-h* and *11β-hsd2* were observed during female-to-male sex reversal, indicating the large production of 11-KT during this process. Overall, as shown in Fig. 6, androgens are synthesized in large amounts in *M. albus* during sex reversal, promoting the transcription of *dmrt1* via putative ARE(s), which in turn, induces ovarian somatic cells to transdifferentiate into testicular somatic cells.

## Methods

### *Fish*

The wild *M. albus* (body weight ~200 g) were collected from Hubei, China and transported to the Fish Breeding Laboratory, Shanghai Ocean University (Shanghai, China). After 30 days of acclimation, the animals were sacrificed by anesthesia with MS-222 and dissected on ice. A portion of the gonad was fixed in Bouin's fluid for histological assessment of the sexual status. The other samples were frozen in liquid nitrogen and stored at -80 °C. All experiments were performed with the approval from the Institutional Animal Care and Use Committee of Shanghai Ocean University.

### *Isolation of 5' upstream region of dmrt1 and sequence analysis*

247 Genomic DNA was isolated from gonad tissue by using manufacturer's protocol  
248 (Qiagen, GmbH, Germany). The integrity of DNA was checked using 2% agarose gel  
249 electrophoresis. Based on the DNA sequence of *M. albus dmrt1* obtained from NCBI  
250 (Accession No: NW-018128265), the specific primers (Supplementary Table 1) were  
251 designed to amplify the 5' upstream region of *dmrt1* gene. The JASPAR database and  
252 associated tools (<http://jaspar.genereg.net>), Match (BioBase), AliBaba2.1 (Biobase)  
253 and MOTIF (GenomeNet) were used to predict the transcription factor binding sites  
254 (56-58).

#### 255 ***Histology and light microscopy observation***

256 The dissected gonads were stored in 4% paraformaldehyde for 24 h. After  
257 rinsing with flowing water, the gonads were dehydrated in a series of ethanol,  
258 embedded in paraffin and cut by a microtome at 6  $\mu$ m thickness. After  
259 hematoxylin-eosin dye, the stained sections were observed under an inverted  
260 phase-contrast microscope (Olympus BX-53, Tokyo, Japan).

#### 261 ***In vitro culture***

262 The ovotestis (Supplementary Fig. 1) was cut into  $1 \times 1 \times 0.5$  mm<sup>3</sup> small pieces,  
263 washed three times with PBS  $\times 1$ , and then transferred to 24-well culture plates. The  
264 control group was cultured in a medium containing 15% fetal bovine serum and 1%  
265 penicillin/streptomycin. The treatment groups were cultured in a medium containing  
266 additional 10 (low) or 100 ng/ml (high) of T. The gonadal tissues were cultured in  
267 CO<sub>2</sub> incubator at 27 °C. One half of the medium was changed every other day. The  
268 growth of cell was observed under an inverted microscope daily and sampled on day 6

269 and day 12 for *dmrt1a* and *folx2* expression analysis.

#### 270 ***Total RNA extraction and cDNA synthesis***

271 Total RNA was extracted using Trizol method (Invitrogen, USA) according to  
272 the manufacturer's instructions. The quality of total RNA was determined by using a  
273 NanoDrop 2000 spectrophotometer (Thermo Fisher Scientific, USA) measured at  
274 260/280 nm, and the integrity was screened by 1.5% agarose gel electrophoresis.  
275 The cDNA was synthesized by using a PrimeScript™ RT reagent Kit (Takara, China)  
276 following the manufacturer's instructions. The obtained cDNA templates were stored  
277 at -80 °C for gene cloning and qRT-PCR amplification.

#### 278 ***Cloning the full-length cDNA of *11β-h* and *11β-hsd2* gene and sequence analysis***

279 The primers (Supplementary Table 1) were designed to amplify the internal  
280 region of *11β-h* and *11β-hsd2* gene respectively by using Takara PCR Amplification  
281 Kit (Takara, Japan). To obtain the full-length cDNA sequences, 3' and 5'  
282 rapid-amplification of cDNA ends Polymerase Chain Reaction (RACE-PCR) was  
283 carried out by using the SMART™ RACE cDNA Amplification Kit (Clontech, USA)  
284 according to the manufacturer's instructions. The amplified PCR products were  
285 excised by 1.5% agarose gel electrophoresis, and bands of expected size were  
286 dissociated and purified by using a gel extraction kit (Omega, China). The PCR  
287 products were directly ligated into PMD19-T simple vector (TaKaRa, China) and then  
288 transformed into Escherichia coli BL21 competent cells (Transgen, China).

289 Prediction of the open reading frame on *11β-h* and *11β-hsd2* was performed by  
290 using the BLAST Program of NCBI (<http://www.ncbi.nlm.nih.gov/blast>). Prediction

of the protein domains were carried out by using the SMART program (<http://www.smart.emble-heidelberg.de/>), InterPro (<http://www.ebi.ac.uk/interpro/>) and IMGT (<http://www.imgt.org/>). Prediction of signal peptide was performed by using the SignalP 4.0 (<http://www.cbs.dtu.dk/services/SignalP/>). Conserved motifs were identified by using Conserved Domain Search Service from NCBI. Multiple alignments of amino acid sequences were performed by using the ESPript (<http://multalin.toulouse.inra.fr/multalin/>). The phylogenetic neighbor-joining (NJ) tree was constructed by using the MEGA 6.0 program (59), and the reliability was assessed by 1000 bootstrap replications.

### 300 ***Quantitative real-time PCR and expression analysis***

The expression levels of *dmrt1a*, *foxl2*, *11β-h* and *11β-hsd2* were quantified by real-time quantitative RT-PCR with specific primers (Supplementary Table 1), by using SYBR Premix Ex *Taq* II (Tli RNaseH Plus) Kit (Takara, Dalian, China) and CFX96TM real-time system (Bio-Rad, Hercules, CA, USA). At the end of the reactions, the credibility of the qRT-PCR was analyzed through melting curve. All samples were run in triplicate, and each assay was repeated three times. After finishing the program, the cycle threshold (Ct) value was automatically determined by the Bio-Rad CFX Manager software. The mRNA expression levels were calculated relative to β-actin using the  $2^{-\Delta\Delta C_t}$  method (60).

### 310 ***Statistical analysis***

Raw data were assessed for the normality of distribution and the homogeneity of variance with the Kolmogorov-Smirnov test and Levene's test, respectively. The data

313 conformed to a normal distribution and were suitable for testing with analysis of  
314 variance (ANOVA). The differences in mRNA expression levels of *dmrt1a*, *foxl2*,  
315 *11β-h* and *11β-hsd2* between treatments were compared with one-way ANOVA at the  
316 significance level of 0.05 ( $p < 0.05$ ). Data analyses were performed using the software  
317 SPSS for Windows (Release 20.0).

318

319     **Acknowledgements**

320             This research is funded by Ministry of Agriculture, Science and Technology  
321     Education Department (201003076).

322     **Author contributions**

323             B.W. and X.Q. designed the research and drafted the paper, L.P. conducted the  
324     cell culture, J.G. isolated of 5' upstream region of *dmrt1*, H.W. conducted the gene  
325     cloning, Q.W. conducted the gene expression.

326     **Competing interests**

327             The authors declare that they have no competing interests.

328



## 329     **References**

- 330     1. Devlin RH, Nagahama Y (2002) Sex determination and sex differentiation in fish:  
331        an overview of genetic, physiological, and environmental influences. *Aquaculture*  
332        **208**: 191-364.
- 333     2. Kusakabe M, Nakamura I, Young G (2003) 11 $\beta$ -Hydroxysteroid dehydrogenase  
334        complementary deoxyribonucleic acid in rainbow trout: cloning, sites of  
335        expression, and seasonal changes in gonads. *Endocrinology* **144**: 2534-2545.
- 336     3. Jiang JQ, et al. (2003) Isolation, characterization and expression of  
337        11 $\beta$ -hydroxysteroid dehydrogenase type 2 cDNAs from the testes of Japanese  
338        eel (*Anguilla japonica*) and Nile tilapia (*Oreochromis niloticus*). *J Mol Endocrinol*  
339        **31**: 305-315.
- 340     4. Liu S, et al. (2000) Expression of cytochrome P45011 $\beta$  (11 $\beta$ -hydroxylase) gene  
341        during gonadal sex differentiation and spermatogenesis in rainbow trout,  
342        *Oncorhynchus mykiss*. *J Steroid Biochem* **75**: 291-298.
- 343     5. Kusakabe M, et al. (2002) Molecular cloning and expression during  
344        spermatogenesis of a cDNA encoding testicular 11 $\beta$ -hydroxylase (P45011 $\beta$ ) in  
345        rainbow trout (*Oncorhynchus mykiss*). *Mol Reprod Dev* **62**: 456-469.
- 346     6. Yokota H, et al. (2005) Effects of 4-tert-pentylphenol on the gene expression of  
347        P450 11 $\beta$ -hydroxylase in the gonad of medaka (*Oryzias latipes*). *Aquat Toxicol* **71**:  
348        121-132.
- 349     7. Maugars G, Schmitz M (2008) Gene expression profiling during spermatogenesis  
350        in early maturing male Atlantic salmon parr testes. *Gen Comp Endocr* **159**:

- 351 178-187.
- 352 8. Ijiri S, et al. (2008) Sexual dimorphic expression of genes in gonads during early  
353 differentiation of a teleost fish, the Nile tilapia *Oreochromis niloticus*. *Biol Reprod*  
354 **78**: 333-341.
- 355 9. Zhang WL, et al. (2010) Molecular cloning of two isoforms of 11 $\beta$ -hydroxylase  
356 and their expressions in the Nile tilapia, *Oreochromis niloticus*. *Gen Comp Endocr*  
357 **165**: 34-41.
- 358 10. Rajakumar A, Senthilkumaran B (2015) Dynamic expression of 11 $\beta$ -hydroxylase  
359 during testicular development, recrudescence and after hCG induction, *in vivo* and  
360 *in vitro* in catfish, *Clarias batrachus*. *Gen Comp Endocr* **211**: 69-80.
- 361 11. Smith CA, et al. (2009) The avian Z-linked gene *DMRT1* is required for male sex  
362 determination in the chicken. *Nature* **461**: 267-271.
- 363 12. Matson CK, Zarkower D (2012) Sex and the singular DM domain: insights into  
364 sexual regulation, evolution and plasticity. *Nat Rev Genet* **13**: 163-174.
- 365 13. Picard MAL, et al. (2015) The roles of *Dmrt* (Double sex/Male-abnormal-3  
366 Related Transcription factor) genes in sex determination and differentiation  
367 mechanisms: Ubiquity and diversity across the animal kingdom. *CR Biol* **338**:  
368 451-462.
- 369 14. Marchand O, et al. (2000) DMRT1 expression during gonadal differentiation and  
370 spermatogenesis in the rainbow trout, *Oncorhynchus mykiss*. *Bba-Gene Regul*  
371 *Mech* **1493**: 180-187.
- 372 15. Matsuda M, et al. (2002) *DMY* is a Y-specific DM-domain gene required for male

- 373 development in the medaka fish. *Nature* **417**: 559-563.
- 374 16. Nanda I, et al. (2002) A duplicated copy of *DMRT1* in the sex-determining region  
375 of the Y chromosome of the medaka, *Oryzias latipes*. *P Natl Acad Sci USA* **99**:  
376 11778-11783.
- 377 17. Matsuda M, et al. (2007) *DMY* gene induces male development in genetically  
378 female (XX) medaka fish. *P Natl Acad Sci USA* **104**: 3865-3870.
- 379 18. Kobayashi T, et al. (2004) Two DM domain genes, *DMY* and *DMRT1*, involved in  
380 testicular differentiation and development in the medaka, *Oryzias latipes*. *Dev*  
381 *Dynam* **231**: 518-526.
- 382 19. Masuyama H, et al. (2012) *Dmrt1* mutation causes a male-to-female sex reversal  
383 after the sex determination by *Dmy* in the medaka. *Chromosome Res* **20**: 163-176.
- 384 20. Guo Y, et al. (2005) Gene structure, multiple alternative splicing, and expression  
385 in gonads of zebrafish *Dmrt1*. *Biochem Bioph Res Co* **330**: 950-957.
- 386 21. Webster KA, et al. (2017) *Dmrt1* is necessary for male sexual development in  
387 zebrafish. *Dev Biol* **422**: 33-46.
- 388 22. Wen AY, et al. (2014) CpG methylation of *dmrt1* and *cyp19a* promoters in relation  
389 to their sexual dimorphic expression in the Japanese flounder *Paralichthys*  
390 *olivaceus*. *J Fish Biol* **84**: 193-205.
- 391 23. Deloffre LA, Martins RS, Mylonas CC, Canario AV (2009) Alternative transcripts  
392 of *DMRT1* in the European sea bass: Expression during gonadal differentiation.  
393 *Aquaculture* **293**: 89-99.
- 394 24. Liu CK (1944) Rudimentary hermaphroditism in the synbranchoid eel,

- 395       *Monopterus javaensis*. *Sinensia* **15**: 1-8.
- 396   25. Cheng H, Guo Y, Yu Q, Zhou R (2003) The rice field eel as a model system for  
397       vertebrate sexual development. *Cytogenet. Genome Res* **101**: 274-277.
- 398   26. Yeung WSB, Chen H, Chan STH (1993) The *in vitro* metabolism of radioactive  
399       androstenedione and testosterone by the gonads of the protogynous *Monopterus*  
400       *albus* at different sexual phases: a time-course and seasonal study. *Gen Comp*  
401       *Endocr* **89**: 313-322.
- 402   27. Yeung WSB, Chen H, Chan STH (1993) *In vivo* effects of oLH and LHRH-analog  
403       on sex reversal and plasma sex steroid profiles in the female *Monopterus albus*.  
404       *Gen Comp Endocr* **90**: 23-30.
- 405   28. He Z, et al. (2014) Differentiation and morphogenesis of the ovary and expression  
406       of gonadal development-related genes in the protogynous hermaphroditic  
407       ricefield eel *Monopterus albus*. *J Fish Biol* **85**: 1381-1394.
- 408   29. Liu JF, Guiguen Y, Liu SJ (2009) Aromatase (P450arom) and 11 $\beta$ -hydroxylase  
409       (P45011 $\beta$ ) genes are differentially expressed during the sex change process of the  
410       protogynous rice field eel, *monopterus albus*. *Fish physiol Biochem* **35**: 511-518.
- 411   30. Zhou R, et al. (2003) Similar gene structure of two *Sox9a* genes and their  
412       expression patterns during gonadal differentiation in a teleost fish, rice field eel  
413       (*Monopterus albus*). *Mol Reprod Dev* **66**: 211-217.
- 414   31. Yu H, Cheng H, Guo Y, Xia L, Zhou R (2003) Alternative splicing and differential  
415       expression of *P450c17* (*CYP17*) in gonads during sex transformation in the rice  
416       field eel. *Biochem Bioph Res Co* **307**: 165-171.

- 417 32. Wang R, et al. (2003) Molecular cloning and expression of *Sox17* in gonads  
418 during sex reversal in the rice field eel, a teleost fish with a characteristic of  
419 natural sex transformation. *Biochem Bioph Res Co* **303**: 452-457.
- 420 33. Huang X, et al. (2005) Multiple alternative splicing and differential expression of  
421 *dmrt1* during gonad transformation of the rice field eel. *Biol Reprod* **73**:  
422 1017-1024.
- 423 34. Xiao YM, et al. (2010) Contrast expression patterns of JNK1 during sex reversal  
424 of the rice field eel. *J Exp Zool Part B* **314**: 242-256.
- 425 35. Hu Q, Guo W, Gao Y, Tang R, Li D (2014) Molecular cloning and analysis of  
426 gonadal expression of *Foxl2* in the rice-field eel *Monopterus albus*. *Sci Rep-UK* **4**:  
427 6884.
- 428 36. Gao Y, et al. (2014) Characterization and differential expression patterns of  
429 conserved microRNAs and mRNAs in three genders of the rice field eel  
430 (*Monopterus albus*). *Sex Dev* **8**: 387-398.
- 431 37. Zhu Y, Wang C, Chen X, Guan G (2016) Identification of gonadal soma-derived  
432 factor involvement in *Monopterus albus* (protogynous rice field eel) sex change.  
433 *Mol Biol Rep* **43**: 629-637.
- 434 38. Qu XC, Jiang JY, Cheng C, Feng L, Liu QG (2015) Cloning and transcriptional  
435 expression of a novel gene during sex inversion of the rice field eel (*Monopterus*  
436 *albus*). *SpringerPlus* **4**: 745.
- 437 39. Qu XC, et al. (2014) Construction and analysis of gonad suppression subtractive  
438 hybridization libraries for the rice field eel, *Monopterus albus*. *Gene* **540**: 20-25.

- 439 40. Zhao X, et al. (2018) Chromosome-scale assembly of the *Monopterus* genome.  
440 *GigaScience* **7**: giy046.
- 441 41. Sheng Y, et al. (2014) Identification of *Dmrt* genes and their up-regulation during  
442 gonad transformation in the swamp eel (*Monopterus albus*). *Mol Biol Rep* **41**:  
443 1237-1245.
- 444 42. Jeong HB, et al. (2009) Isolation and characterization of DMRT1 and its putative  
445 regulatory region in the protogynous wrasse, *Halichoeres tenuispinis*. *Gene* **438**:  
446 8-16.
- 447 43. Danino YM, Even D, Ideses D, Juven-Gershon T (2015) The core promoter: at the  
448 heart of gene expression. *Bba-Gene Regul Mech* **1849**: 1116-1131.
- 449 44. Halees AS, Leyfer D, Weng Z (2003) PromoSer: a large-scale mammalian  
450 promoter and transcription start site identification service. *Nucleic Acids Res* **31**:  
451 3554-3559.
- 452 45. Miura T, Yamauchi K, Takahashi H, Nagahama Y (1991) Hormonal induction of  
453 all stages of spermatogenesis *in vitro* in the male Japanese eel (*Anguilla japonica*).  
454 *P Natl Acad Sci USA* **88**: 5774-5778.
- 455 46. Jo PG, et al. (2007) Induced expression of doublesex-and mab-3-related  
456 transcription factor-1 (DMRT-1) mRNA by testosterone in the olive flounder,  
457 *Paralichthys olivaceus* ovary. *J. Aquaculture* **20**: 199-202.
- 458 47. Raghuveer K, et al. (2005) Effect of methyl testosterone-and ethynyl  
459 estradiol-induced sex differentiation on catfish, *Clarias gariepinus*: expression  
460 profiles of *DMRT1*, Cytochrome P450aromatases and 3  $\beta$ -hydroxysteroid

- 461 dehydrogenase. *Fish physiol Biochem* 31: 143-147.
- 462 48. Shin HS, An KW, Park MS, Jeong MH, Choi CY (2009) Quantitative mRNA  
463 expression of *sox3* and DMRT1 during sex reversal, and expression profiles after  
464 GnRHa administration in black porgy, *Acanthopagrus schlegeli*. *Comp Biochem*  
465 *Phys B* **154**: 150-156.
- 466 49. Oike A, Kodama M, Nakamura Y, Nakamura MA (2016) Threshold dosage of  
467 testosterone for female to male sex reversal in *Rana rugosa* Frogs. *J Exp Zool*  
468 *Part A* **325**: 532-538.
- 469 50. Aoyama S, et al. (2003) Expression of Dmrt1 protein in developing and in  
470 sex-reversed gonads of amphibians. *Cytogen. Genome Res* **101**: 295-301.
- 471 51. Matson CK, et al. (2011) DMRT1 prevents female reprogramming in the postnatal  
472 mammalian testis. *Nature* **476**: 101-104.
- 473 52. Uhlenhaut NH, et al. (2009) Somatic sex reprogramming of adult ovaries to testes  
474 by FOXL2 ablation. *Cell* **139**: 1130-1142.
- 475 53. Qu XC (2018) Sex determination and control in eels. In: Sex Control in  
476 Aquaculture (Wang HP, Piferrer F, Chen SL Eds.). John Wiley & Sons Hoboken  
477 NJ 775-792.
- 478 54. Nagahama Y (2000) Gonadal steroid hormones: major regulators of gonadal sex  
479 differentiation and gametogenesis in fish. In International Symposium on the  
480 Reproductive Physiology of Fish.
- 481 55. Song P, Xiong QM (1993) The annual cycle of serum estradiol and testosterone in  
482 spontaneous sex-reversing fish *Monopterus albus* (zuiew). *J Wuhan Univ* **2**:

483 115-120.

484 56. Sandelin A, Alkema W, Engström P, Wasserman WW, Lenhard B (2004) JASPAR:

485 an open access database for eukaryotic transcription factor binding profiles.

486 *Nucleic Acids Res.* **32**: D91-D94.

487 57. Grabe N (2002) AliBaba2: context specific identification of transcription factor

488 binding sites. *In Silico Biol* **2**: S1-S15.

489 58. Kel AE, et al. (2003) MATCHTM: a tool for searching transcription factor binding

490 sites in DNA sequences. *Nucleic Acids Res* **31**: 3576-3579.

491 59. Tamura K, Stecher G, Peterson D, Filipski A, Kumar S (2013) MEGA6: molecular

492 evolutionary genetics analysis version 6.0. *Mol Biol Evol* **30**: 2725-2729.

493 60. Livak KJ, Schmittgen TD (2001) Analysis of relative gene expression data using

494 real-time quantitative PCR and the 2<sup>-</sup>ΔΔCT method. *Methods* **25**: 402-408.

495



496 Figure captions

497 Fig. 1. Nucleotide sequence of *M. albus dmrt1* 5' upstream region with its potential  
498 transcription factor binding sites. The potential transcription binding sites are boxed  
499 or underlined. (\*) indicates ARE on the antisense strand. (+1) means transcription  
500 start site.

501 Fig. 2. *In vitro* culture of ovotestis in *M. albus*. A: tissue culture after 6 hours; B:  
502 tissue culture after 1 day; C: tissue culture after 6 days; D: tissue culture after 12 days.  
503 E: epithelioid cells; F: fibroblast cells; G: germinal stem cells.

504 Fig. 3. Effects of T on the expression levels of (A) *foxl2* and (B) *dmrt1a* in the  
505 ovotestis of *M. albus*. Different letters indicate significant difference between groups  
506 within each time ( $p < 0.05$ ).

507 Fig. 4. Expression level of *11β-h* during *M. albus* gonadal development. F, ovaries; I,  
508 ovotestis; M, testis. (\*) indicates significant difference with the former ( $p < 0.05$ ).

509 Fig. 5. Expression level of *11β-hsd2* during *M. albus* gonadal development. F, ovaries;  
510 I, ovotestis; M, testis. (\*) indicates significant difference with the former ( $p < 0.05$ ).

511 Fig. 6. The framework for clarifying the mechanism of *M. albus* sex  
512 transdifferentiation. Androgens are synthesized in large amounts in the ovotestis,  
513 which activates the transcription of *dmrt1* via putative AREs, resulting in biological  
514 effects, which in turn, induces ovarian somatic cells to transdifferentiate into testicular  
515 somatic cells. As such, a positive regulatory loop programs the *M. albus* sex reversal.  
516 On the other hand, androgens inhibit the expression of *foxl2* and its function.

517

518 Fig. 1

519 **GATA-1**

520 -1412

521 ATTAGAATATCGTGGACAAAAATTATTTTCAGTAATTCAACTCAAATAGTGAAACTCAT

522 GTATTATATAA

523 1343

524 ATTCAGTACACACAGACTGAAGTAGTTTAAGCCGTTGGGTCTTTTTATTGTGATGATT

525 TTGGCCACAT

526 **SOX5 SRY**

527 -1274

528 TTAACAAAACCCACCAACAACAAAGAAGCTAACCTAACAGCAACAGCAAAAACGCT

529 GCGCAAATTAGA

530 -1205

531 GTTGGTCAGAAGTGATTTATTTAGCCATATTTGAAAAATAAGCCTCTAGCAGAGTTAG

532 ACGCTATCTAA

533 **Oct-1**

**Oct-1**

534 -1136

535 AACGCATTTAGCTGTTTGAGCGAATAAACATATCATTTTGCAAATAAAGAAAAGATGT

536 ATGGGGTAAAA

537 **Stat3/Stat4**

**Oct-1**

538 -1067

539 AAGGAGCGTCTGCGGTAGACTAGTAACGTAACGTTACCTCTCCAACTGCTCCTCCA

540 AATACCGTATTTG

541 Stat1:Stat2 GATA-1

542 -998

543 AATCAGGTAGACATCCTTTTCTTTCTTGCTGGACCGATTTTATTTGTAGGCCTCTCG

544 TTTTTCGATGT

545 GRE ARE\*/SOX9 Sp1

546 -929

547 TTTCTGTCTTCATCTTGTTTGTCACCGCCTTTTTTAGCCTTCTTTTGGGCATTGTG

548 TCTCAGAAAGT

549 Oct-1 GR Stat6 USF

550 -860

551 TTGCTAAGTTTACGCGAGAGCCAGCGTAGAACTAAACGTTGTTGCTAGACAACAAT

552 GGTGCCTTCATG

553 Pit-1a GATA-1

554 -791

555 GACTCCTCGAAAAGTTGTTCTCTACTTTTTCTACTATTTCAAGTTCTCTGGTTATTTAA

556 TCCCATTATT

557 GRE

558 -722

559 TATTATCACCACATGCCAGACCAGATTGAAAAATTTGGTAATTAACATTAAAGAACTG

560 ATAGCATCTTG

561 SOX5/SOX9/SRY ARE SRY

562 -653

563 TTATGCTTGCCACACACGGAGGAAATTTTGTTTCTAGTATTGCAGTACTTGAAAGCAGT

564 ACTTTTACTC

565 TBP TBP Oct-1

566 -584

567 ATTGTAGTATTTTTATGGTGAGCTATTTGCTACTTTTAGGAACTTATCGATTGCACATT

568 ATAAGTAATA

569 Oct-1 GATA-1

570 -515

571 ATTTACTACAAAATAGTTGTGTCTTTTAGGTTTACTTTTTCATCACTGAAGTATGTGA

572 TAGTCTCACA

573 Oct-1

574 -466

575 GTTTATTTCTACTAAATTTTATAAAAGTGCAGCCATGACCTCTGGGTTCCCTCATCATA

576 TTAGGTCATGT

577 E2 SOX9

578 -377

579 CCAGCTCAGTGGAGATTAAAAAATCTCGTGGCACTTTGTAGTTTTCCTTGTA

580 ACCGAGTATTT

581 Pit-1a C/EBPalp Oct-1

582 -308

583 TCAACCTACACTTACTGTGCTACTTTTAGTTAAGTAAAGATTCCGGTGCTTCCGCCACT

584 GCAGCAGGTCA

585 ERE GRE

586 -239

587 CTTGAAAACTGGGCTTTATGTAACTATAAACATGTTTTACCAGTAATTTAGTGTGA

588 AAACCAAATCA

589 GATA-1 Sp1 Oct-1

590 -170

591 GAGTGTAATAGAGAGACGCCACTGTCCTGACAGCTTTCTCCCCGTTTCCAGCTCGTT

592 TGCTCCCAATGC

593 TBP GATA-1 Sp1 Sp1

594 -101

595 AGTTTGGAAAAAAGCCCAGGATTGGGAAAAATGCAATAGTAAGGCGGGGATGGGCG

596 GAGACGGACAG

597 Sp1 +1

598 -32

599 TGACCTTATAGCCTCCACCCTGGCACCAATAAGCTCTAACCAGCCTTGTGCTCCATG

600 GACAGGTTTGGC

601 +38

602 AGTTGGCAGCATAGTTGTATGGTTTTACTTCCACTATGAACAAGGACAAGCAGCGCA

603 AGCAGGTGCTGGACT

604

605 Fig. 2

606

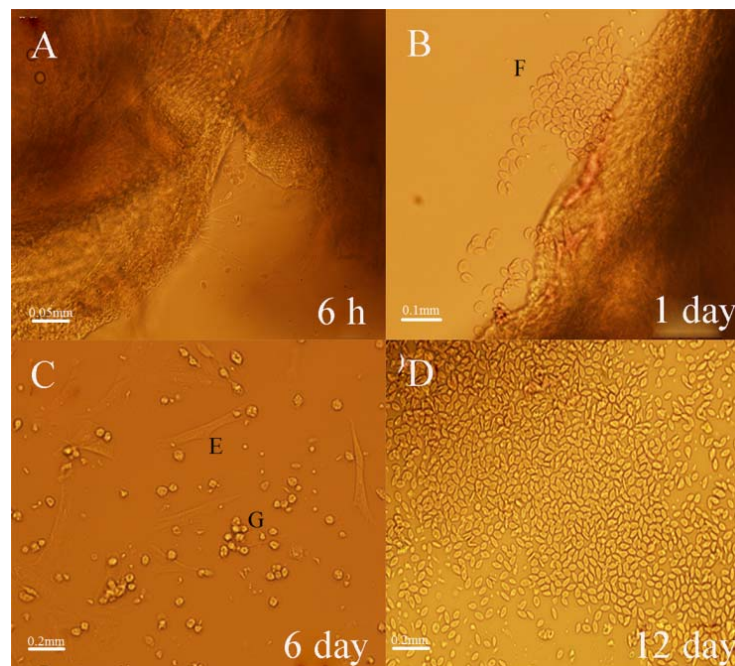

607

608

609 Fig. 3

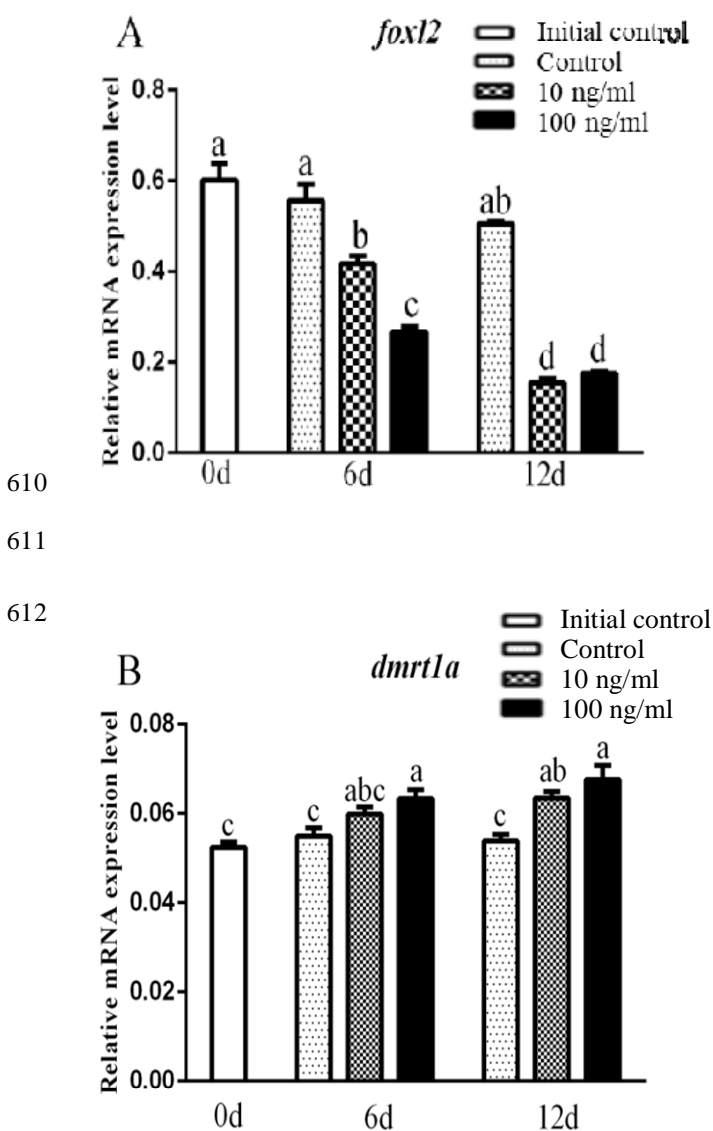

613 Fig. 4

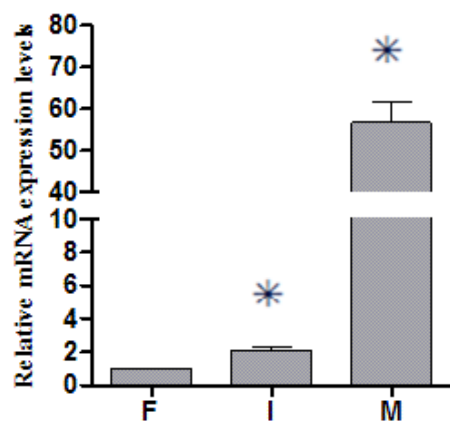

614

615



616 Fig. 5

617

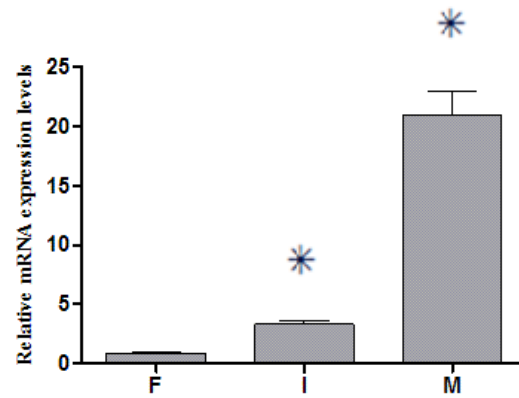

618

619

Fig. 6

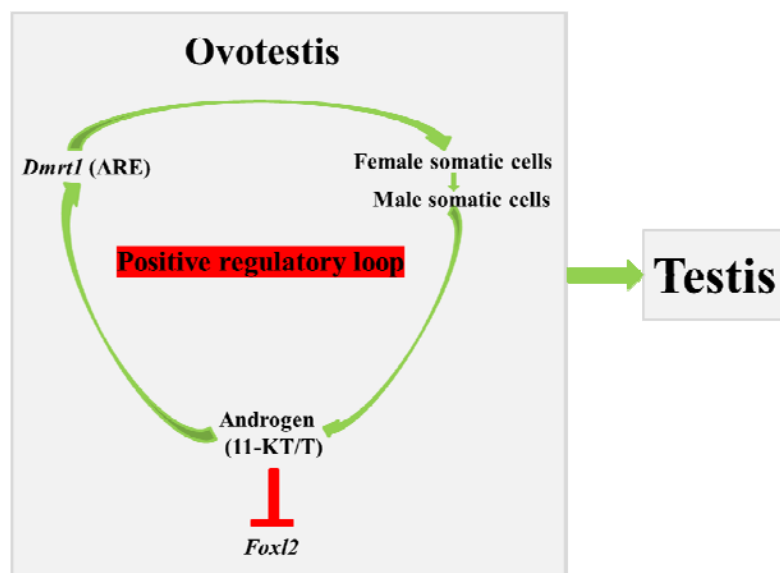

Source: https://www.biorxiv.org/content/10.1101/595306v1.full.pdf
